# Supplementary material
Source: ML conference proceedings conference paper supplement (https://proceedings.neurips.cc/paper_files/paper/2010/hash/27ed0fb950b856b06e1273989422e7d3-Abstract.html)
Supplement: Supplementary file 2 [file 27ed0fb950b856b06e1273989422e7d3-Supplemental.zip]

Archive with 1 entries (1 files):
- extra/NIPS2010_1039_extra.pdf
